# Supplementary material
Source: Research Square preprint supplement (doi:10.21203/rs.3.rs-8862018/v1)
Supplement: Supplementary file 1 [file efc0d5c62314de3f0b5414d6.docx]

**Supplementary materials**

# 1. Tables mentioned in the manuscript

Supplementary Table S1 Distribution of farmers’ effective participation in WRH.

|  | Low  [0,1) | Relatively low  [1,2) | Medium [2,3) | Relatively high  [3,4) | High  [4,5) | Total |
| --- | --- | --- | --- | --- | --- | --- |
| Frequency | 0 | 20 | 106 | 82 | 5 | 213 |
| Proportion | 0 | 9.39% | 49.76% | 38.50% | 2.35% | 100% |

**Supplementary Table S2 Robustness test for impact of farmers’ effective participation on their different rights and interests**

| Variables | Level of farmers’ rights and interests | Economic right | Living right | Social right |
| --- | --- | --- | --- | --- |
| Level of farmers’ effective participation | 2.489*** | 0.995*** | 1.323*** | 0.756** |
| (5.345) | (3.198) | (4.343) | (2.567) |
| Control Variables | YES | | | |
| Constants | -13.195*** | -7.377*** | -4.547*** | -3.176** |
| (-5.388) | (-4.308) | (-2.969) | (-2.077) |
| *N* | 213 | 213 | 213 | 213 |
| *LR* | 0.0000 | 0.0000 | 0.0000 | 0.0000 |
| *Pseudo R2* | 0.488 | 0.265 | 0.197 | 0.209 |

***Note(s):*** *, **, and *** denote significant level of 10%, 5%, and 1%. Numbers in parentheses are T-values.

**Supplementary Table S3 Robustness test results: the effects of different elements of farmers’ effective participation on farmers’ rights and interests**

| Variables | Coef | Std.Err |
| --- | --- | --- |
| Participation awareness | 4.096** | 2.008 |
| Participation ability | 2.423** | 1.125 |
| Participation support | 2.149** | 1.060 |
| Participation outcomes | 2.277* | 1.266 |
| Control Variables | YES | |
| Constants | -13.331*** | 2.483 |
| *N* | 213 | |
| *LR* | 0.000 | |
| *Pseudo R2* | 0.490 | |

***Note(s):*** *, **, and *** denote significant level of 10%, 5%, and 1%.

# 2. Data files

## 2.1 Survey instruments and protocols

### 2.1.1 Questionnaires

1. What is your age? __________ (years)
2. What is your political status? 1 = Party member; 0 = Non-party member
3. How many years of education have you received? __________ (years)
4. Household population information:
   (1) Total registered population ______ persons; registered permanent population (living more than 6 months per year) ______ persons; non-registered permanent population ______ persons; total permanent population ______ persons; total household population (registered + non-registered permanent population) ______ persons.
5. Among total household members: labor force ______ persons; migrant workers ______ persons; long-term migrant workers ______ persons; highest years of education among labor force ______; average age of labor force ______.
6. Overall health status of family members:
   1 = Very poor (serious illness/long-term bedridden patient);
   2 = Relatively poor (chronic illness);
   3 = Average;
   4 = Relatively good;
   5 = Very good.
7. Cultivated land situation:
   Total cultivated land area ______ (mu); walking time from home to cultivated land ______ (minutes); whether land transfer has occurred ______ (1 = Yes; 0 = No); of which, land transferred in ______ (mu); land transferred out ______ (mu); idle land ______ (mu); self-cultivated land ______ (mu).
8. Post-withdrawal housing area (building area): ______ (m²)
9. What is the type of house after withdrawal? ______ (1= apartment building unit; 2= detached house)
10. How satisfied are you with the housing layout in the resettlement area?
    1 = Very dissatisfied; 2 = Relatively dissatisfied; 3 = Average; 4 = Relatively satisfied; 5 = Very satisfied.
11. How do you evaluate the housing quality in the resettlement area?
    1 = Poor; 2 = Relatively poor; 3 = Average; 4 = Relatively good; 5 = Good.
12. How do you evaluate the living environment after homestead withdrawal?
    1 = Poor; 2 = Relatively poor; 3 = Average; 4 = Relatively good; 5 = Good.
13. How do you evaluate the transportation conditions after homestead withdrawal?
    1 = Poor; 2 = Relatively poor; 3 = Average; 4 = Relatively good; 5 = Good.
14. How do you evaluate the infrastructure after homestead withdrawal?
    1 = Poor; 2 = Relatively poor; 3 = Average; 4 = Relatively good; 5 = Good.
15. How convenient is daily life after homestead withdrawal?
    1 = Very inconvenient; 2 = Inconvenient; 3 = Average; 4 = Relatively convenient; 5 = Very convenient.
16. How convenient is farming after homestead withdrawal?
    1 = Very inconvenient; 2 = Inconvenient; 3 = Average; 4 = Relatively convenient; 5 = Very convenient.
17. How would you evaluate non-agricultural employment opportunities after homestead withdrawal?
    1 = Almost none; 2 = Relatively few; 3 = Average; 4 = Relatively many; 5 = Very many.
18. How difficult is it to obtain employment after homestead withdrawal?
    1 = Very difficult; 2 = Relatively difficult; 3 = Average; 4 = Relatively easy; 5 = Very easy.
19. What types of social insurance have your family members participated in or purchased? (Multiple choices)
    ① Rural medical insurance;
    ② Rural pension insurance;
    ③ Urban employee pension insurance;
    ④ Urban employee medical insurance;
    ⑤ Commercial insurance;
    ⑥ Others (please specify).
20. How often do you inquire village cadres about homestead-related policies or information?
    1 = Never inquire; 2 = Rarely inquire; 3 = Occasionally inquire; 4 = Often inquire; 5 = Always inquire.
21. How would you describe farmers’ autonomy in participation?
    1 = Farmers have a very vague understanding of participation and completely follow others’ opinions;
    2 = Farmers have a vague understanding and are strongly influenced by others;
    3 = Farmers have a relatively clear understanding but are somewhat influenced by others;
    4 = Farmers have a clear understanding and are minimally influenced by others;
    5 = Farmers have a clear understanding and are not influenced by others at all.
22. How effective is the expression of farmers’ opinions?
    1 = Willingness and opinions are not fully expressed and are not sufficiently precise or clear;
    2 = Generally fully expressed but not sufficiently precise or clear;
    3 = Generally fully expressed, precise, and clear;
    4 = Relatively fully expressed, precise, and clear;
    5 = Very fully expressed, precise, and clear.
23. What is the proportion of farmers participating in your village?
    1 = Very few participants;
    2 = Relatively few;
    3 = Average;
    4 = Relatively widespread;
    5 = Very widespread.
24. Through which channels can farmers participate? (Multiple choices)
    1 = Hearings or symposiums;
    2 = Village representatives’ meetings;
    3 = Villagers’ assembly;
    4 = Production team meetings;
    5 = Public notice boards;
    6 = Telephone, SMS, or WeChat;
    7 = Household visits;
    8 = Reporting to village cadres, respected elders, or related organizations;
    9 = Others (please specify).
25. How suitable are the participation channels for your village?
    1 = Very unsuitable;
    2 = Relatively unsuitable;
    3 = Average;
    4 = Relatively suitable;
    5 = Very suitable.
26. To what extent are farmers’ opinions accepted by relevant authorities?
    1 = Very low;
    2 = Relatively low;
    3 = Average;
    4 = Relatively high;
    5 = Very high.
27. How often is feedback provided when opinions are not accepted?
    1 = Very rarely;
    2 = Relatively rarely;
    3 = Average;
    4 = Relatively often;
    5 = Very often.
28. Have you proactively expressed your own opinions and views?
    1 = Yes; 0 = No.
29. To what extent is farmers’ participation considered sufficient in your village?
    1 = Opinions were not fully expressed;
    2 = Opinions were relatively fully expressed but not fully unified;
    3 = Opinions were fully expressed but failed to reach consensus;
    4 = Opinions were relatively fully expressed and largely unified;
    5 = In-depth discussions and repeated comparisons resulted in a unified view.

### 2.1.2 Interview guides

This study is conducted by a research student from XX University and aims to examine the socio-economic outcomes of the Withdrawal of Rural Homestead (WRH) policy, as well as farmers’ perceptions of fairness in its implementation process. Participation in this interview is entirely voluntary. You may refuse to answer any question or withdraw from the interview at any time without any adverse consequences. All information you provide will be treated as confidential. Identifiable information will be removed during data processing, and the data will be used solely for academic research purposes. With your consent, the interview may be audio-recorded to ensure the accuracy of transcription. The recording will be securely stored and accessed only by members of the research team.

The interview will cover several aspects of your household situation and experiences. We will begin by discussing your household characteristics and land situation, including your age, education level, political status, family population structure, and cultivated land conditions such as total land area and land transfer activities. We will then discuss your living conditions after homestead withdrawal, including housing type, construction quality, infrastructure, transportation accessibility, and the convenience of both daily life and agricultural production. In addition, we will ask about non-agricultural employment opportunities and your household’s participation in social insurance schemes. Finally, we will explore your experiences during the homestead withdrawal process, including how you obtained information about the policy, the channels through which you expressed your opinions, your level of autonomy in participation, and whether your views were accepted or feedback was provided by relevant authorities. If you understand the purpose of this study and agree to participate, we will proceed with the interview.

### 2.1.3 Data collection procedures

The data for this study were collected through field research conducted in four sample regions in 2023. The selection of these regions considered the stage of implementation of the Withdrawal of Rural Homestead (WRH) policy, levels of economic development, and geographic diversity, with the aim of enhancing variation and comparability across areas.

A multi-stage stratified sampling strategy was adopted. First, four districts or county-level cities were selected to capture differences in regional economic conditions and policy implementation contexts. Within these areas, seven towns were identified. Subsequently, 17 villages (ranging from one to four per town) were randomly selected. Household surveys were then conducted within each selected village.

Primary data were collected through one-on-one, face-to-face interviews to ensure a high response rate and data reliability. The questionnaire was designed to cover four main dimensions: household demographics (e.g., age, education level, and political status), household resource conditions (e.g., cultivated land area and land transfer status), post-withdrawal living conditions (e.g., housing quality, infrastructure, and employment opportunities), and farmers’ participation in the policy implementation process. During the interviews, trained enumerators provided standardized explanations of key terms—such as “non-registered permanent population” and “participation channels”—to ensure respondents’ clear understanding, particularly among participants with varying levels of literacy.

Prior to the formal survey, a pilot test was conducted to refine question wording and improve clarity. All questionnaires were checked for completeness immediately after the interviews. Data were subsequently coded and cleaned to ensure internal consistency and accuracy before statistical analysis.

## 2.2 Variable details

### 2.2.1 Dependent Variables

**Supplementary Table S4 Dependent Variables: Definitions, Coding Schemes and Transformations**

| **Dimension** | **Variable** | **Definition** | **Coding Scheme** | **Transformation Applied** |
| --- | --- | --- | --- | --- |
| Economic right | Per capita agricultural income | Annual agricultural income per capita | Raw continuous value | Interval standardization to [1,5] |
|  | Per capita non-agricultural income | Annual non-agricultural income per capita | Raw continuous value | Interval standardization to [1,5] |
|  | Per capita expenditure | Annual per capita expenditure | Raw continuous value | Reverse transformation, then interval standardization to [1,5] |
|  | Cost of new housing | Compensation minus construction cost comparison | 1–5 ordered scale | Original scale retained |
|  | Satisfaction with economic right | Self-reported economic satisfaction | 1–5 Likert scale | Original scale retained |
|  | Satisfaction with compensation standards | Satisfaction with compensation policy | 1–5 Likert scale | Original scale retained |
| Living right | Per capita living space | Living area after withdrawal | Raw continuous value | Interval standardization to [1,5] |
|  | Housing quality | Comparison with previous housing | 1–5 Likert scale | Original scale retained |
|  | Living environment | Overall living environment quality | 1–5 Likert scale | Original scale retained |
|  | Infrastructure | Infrastructure adequacy | 1–5 Likert scale | Original scale retained |
|  | Living convenience | Daily life convenience | 1–5 Likert scale | Original scale retained |
|  | Farming convenience | Farming accessibility | 1–5 Likert scale | Original scale retained |
| Social right | Arable area | Contracted land area after withdrawal | Raw continuous value | Interval standardization to [1,5] |
|  | Non-agricultural employment opportunities | Availability of non-farm jobs | 1–5 Likert scale | Original scale retained |
|  | Difficulty of employment | Perceived employment difficulty | 1–5 Likert scale | Original scale retained |
|  | Purchase of social insurance | Number of insurance types purchased | 1–5 ordered scale | Original scale retained |
| Level of farmers’ rights and interests | | Sum of economic right, living right, and social right indices | Continuous composite index | Constructed by summing the three dimension indices after entropy weighting |

***Note(s):*** The indicator “per capita expenditure” is directionally inconsistent with the other indicators; therefore, it is first reverse-coded. The transformation formula is:

Given that the indicators are measured in different units, it is also necessary to eliminate dimensional differences by normalizing the data. The standardized values are rescaled to the interval [1, 5] using the following formula:

where (a) and (b) are set to 1 and 5, respectively.

The entropy weight method was applied to the processed variables.

### 2.2.2 Independent Variables

**Supplementary Table S5 Independent Variables: Definitions, Coding Schemes and Transformations**

| **Dimension** | **Variable** | **Definition** | **Coding Scheme** | **Transformation Applied** |
| --- | --- | --- | --- | --- |
| Participation awareness | Frequency of proactively obtaining policy information | Frequency of information acquisition regarding homestead policy | 1–5 Likert scale | Pre-processed into dimensionless 1–5 score |
|  | Frequency of proactively expressing opinions | Frequency of expressing opinions in participation process | 1–5 Likert scale | Pre-processed into dimensionless 1–5 score |
| Participation ability | Participation cognition | Degree of understanding and independence in participation | 1–5 Likert scale | Pre-processed into dimensionless 1–5 score |
|  | Effect of opinion expression | Clarity and completeness of expressed opinions | 1–5 Likert scale | Pre-processed into dimensionless 1–5 score |
|  | Opinion uniformity | Degree of consensus formation | 1–5 Likert scale | Pre-processed into dimensionless 1–5 score |
| Participation support | Types of participation subjects | Diversity of actors involved in participation | 1–5 ordered scale | Pre-processed into dimensionless 1–5 score |
|  | Breadth of participation subjects | Proportion of villagers participating | 1–5 Likert scale | Pre-processed into dimensionless 1–5 score |
|  | Amount of participation matters | Number of issues participated in | 1–5 ordered scale | Pre-processed into dimensionless 1–5 score |
|  | Diversity of participation channels | Number of participation channels | 1–5 ordered scale | Pre-processed into dimensionless 1–5 score |
|  | Suitability of participation channels | Appropriateness of participation channels | 1–5 Likert scale | Pre-processed into dimensionless 1–5 score |
| Participation outcomes | Acceptance of farmers’ opinions | Degree to which opinions are adopted | 1–5 Likert scale | Pre-processed into dimensionless 1–5 score |
|  | Feedback from unaccepted opinions | Frequency of feedback provided | 1–5 Likert scale | Pre-processed into dimensionless 1–5 score |
| Degree of farmers’ effective participation | | Sum of participation awareness, participation ability, participation support, and participation outcomes | Continuous composite index | Constructed by summing the four dimension indices after entropy weighting |

***Note(s):*** All participation indicators were pre-processed into dimensionless 1–5 scores prior to entropy weighting to eliminate differences in measurement units and magnitude across indicators.

### 2.2.3 Control Variables

**Supplementary Table S6 Control Variables: Definitions, Coding Schemes and Transformations**

| Category | Variable | Definition | Coding Scheme | Transformation Applied |
| --- | --- | --- | --- | --- |
| Household head characteristics | Age | Age of household head | Continuous (years) | Original value retained |
|  | Political status | Whether the household head is a party member | 1 = Yes; 0 = No | Dummy variable; no transformation |
|  | Education level | Years of schooling of household head | Continuous (years) | Original value retained |
| Household characteristics | Family size | Total number of household members | Continuous (number of persons) | Original value retained |
|  | Population in non-agricultural employment | Number of household members engaged in non-farm employment | Continuous (number of persons) | Original value retained |
|  | General health status of the family | Overall family health condition | 1–5 Likert scale | Original scale retained |
|  | Cultivated land transfer | Whether cultivated land has been transferred | 1 = Yes; 0 = No | Dummy variable; no transformation |
| Regional characteristics | Accessibility to transport | Degree of transportation convenience | 1–5 Likert scale | Original scale retained |

***Note(s):*** Continuous control variables were used in their original form. Binary variables were coded as dummy variables. Likert-scale variables retained their original 1–5 coding. No additional transformation was applied to control variables.

## 2.3 Analysis resources

See in the “Analysis resources” file about the data and code (named do file).
